# Supplementary material
Source: ML conference proceedings conference paper supplement (https://proceedings.mlr.press/v189/pandey23a.html)
Supplement: Supplementary file 1 [file pandey23a-supp.pdf]

## On the Interpretability of Attention Networks (Supplementary Material)

### Appendix A. Codes for Reproducing Results

All the datasets and codes are available [here](#).

### Appendix B. Selective Dependence Classification

Figure 1 illustrates data sampled from an example 1-dimensional base distribution with two foreground classes, and the resulting 2-dimensional mosaic distribution obtained as a result of having  $m = 2$  parts per instance. Note the symmetric structure in the scatter plot for the mosaic data, is due to the swap symmetry, i.e. the foreground segment can be either the first or the second segment. This also illustrates that even if the foreground and background are well separated, and the foreground classes are also easily separated, the mosaic data can be significantly more complex. Algorithm 1 in section 3.1 gives the generative model for an instance-label pair in SDC problem.

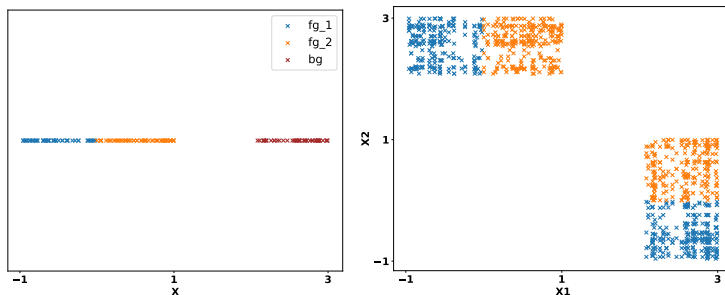

Figure 1: **(left)** Sampled data from  $D_0$ (brown),  $D_1$ (blue),  $D_2$ (orange). **(right)** Mosaic instances.

**Remark:** There have been links made between attention models and multiple instance learning (MIL) [Ilse et al. \(2018\)](#) and attention models were shown to be a good tool to solve such problems. However, MIL is not an apt problem to study the intricacies of attention models. MIL can effectively be viewed as distinguishing between mosaic instances containing no foreground segment and mosaic instances containing at least one foreground segment. This is distinct from the SDC task where we know the existence of a foreground segment, but are interested in finding the class label of the foreground segment.

### Appendix C. Experimental Setup

#### C.1. Illustration for Interpretability in Image Captioning: A case study

As mentioned in Section 2, We have used a standard method of up-sampling to get a  $224 \times 224$  image from  $14 \times 14$  image. Each co-ordinate in the  $14 \times 14$   $\alpha$  vector corresponds to a square patch in the  $224 \times 224$  image.

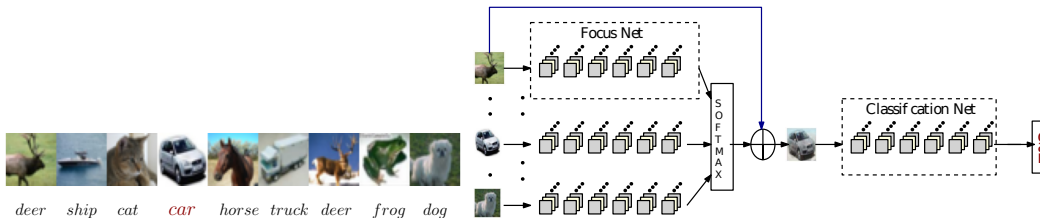

Figure 2: **(Left)** A mosaic instance from CIFAR-SDC Dataset. **(Right)** FCAM Architecture for CIFAR-SDC with averaging at zeroth Layer

Here is a toy example illustrating the interpretability measure in Table 1.

Consider a  $4 \times 4$  image, where say the word “woman” is predicted as the first word, and the object category of “person” is present in the image according to metadata with the bounding box of this object being the top left quarter of the image. The  $\mathbf{v}$  vector here

would be  $\begin{bmatrix} 1 & 1 & 0 & 0 \\ 1 & 1 & 0 & 0 \\ 0 & 0 & 0 & 0 \\ 0 & 0 & 0 & 0 \end{bmatrix}$ . Let the image patches/parts be disjoint  $2 \times 2$  sub-images of the  $4 \times 4$  image

A perfect attention model would have  $\alpha = \begin{bmatrix} 1 & 0 \\ 0 & 0 \end{bmatrix}$ . The normalised inner product of an

upsampled version of  $\alpha$ , which would be  $\begin{bmatrix} 1 & 1 & 0 & 0 \\ 1 & 1 & 0 & 0 \\ 0 & 0 & 0 & 0 \\ 0 & 0 & 0 & 0 \end{bmatrix}$ , and  $\mathbf{v}$  would be 1.

A bad attention model might have  $\alpha = \begin{bmatrix} 0.3 & 0.3 \\ 0.2 & 0.2 \end{bmatrix}$ . The normalised inner product of an

upsampled version of  $\alpha$ , which would be  $\begin{bmatrix} .3 & .3 & .3 & .3 \\ .3 & .3 & .3 & .3 \\ .2 & .2 & .2 & .2 \\ .2 & .2 & .2 & .2 \end{bmatrix}$ , and  $\mathbf{v}$  would be approximately

0.6.

A random baseline that randomly chooses one of the four  $\alpha$  components to have one and zero elsewhere would have a normalised inner product of 0.25 on average. (corresponding to an inner product of 1 with chance of 25% and 0 with a chance of 75%.)

Also we have categorized the words for each class manually. These words were chosen from vocabulary of the captions. Tables 2, 3 and 4 in the appendix shows the associated words with each object category.

### Appendix D. A Synthetic SDC Dataset

We create a 2-dimensional base data, with  $k = 3$ , foreground classes drawn from distributions  $D_1, D_2, D_3$  which are all normally distributed with different means and identity covariance. The background segments are drawn from  $D_0$ , which is a mixture of Gaussians.

| Algorithm | averaging layer | attention mechanism | accuracy | FT     | NNZ( $\alpha$ ) | Dist( $\alpha$ ) | Ent( $\alpha$ ) |
|-----------|-----------------|---------------------|----------|--------|-----------------|------------------|-----------------|
| SM-0      | zeroth          | Softmax (SM)        | 98.89    | 77.80  | 2.407           | 0.242            | 0.677           |
| ER-0      | zeroth*         | Entropy reg.        | 99.07    | 77.33  | 2.139           | 0.159            | 0.479           |
| SpMax-0   | zeroth          | Sparsemax           | 98.57    | 77.076 | 1.612           | 0.174            | 0.394           |
| SSM-0     | zeroth          | Spherical SM        | 96.16    | 71.83  | 3.294           | 0.338            | 1.038           |
| HA-0      | zeroth          | Hard attention      | 97.264   | 12.07  | 1.209           | 0.037            | 0.100           |
| SM-2      | second          | Softmax (SM)        | 99.67    | 86.95  | 4.766           | 0.422            | 1.469           |
| ER-2      | second          | Entropy reg.        | 99.85    | 87.89  | 3.720           | 0.325            | 1.099           |
| SpMax-2   | second          | Sparsemax           | 99.76    | 87.17  | 2.722           | 0.370            | 0.979           |
| SSM-2     | second          | Spherical SM        | 99.79    | 89.12  | 4.962           | 0.393            | 1.380           |
| HA-2      | second          | Hard attention      | 84.91    | 10.64  | 1.247           | 0.0474           | 0.121           |

Table 1: Performance on Synthetic SDC Dataset: Standard FCAM and variants.

We have  $m = 9$  segments in each mosaic instance. Each instance  $\mathbf{x} \in \mathbb{R}^{2 \times 9}$  in mosaic data is associated with a label  $\mathbf{y} \in [3]$ . We sample 6000 such mosaic instances and set aside 3000 points for testing and use the rest for training the FCAM. Algorithm 1 in section 3.1 is used to generate mosaic instances.

The Focus model  $f$  is a multilayer perceptron (MLP) architecture with 2–hidden layers each having 50 units. Classification model  $\mathbf{g}$  is also a MLP architecture with single hidden layer having 50 units. The 3 layers of the focus network allow for averaging to be done at either the input level (2-dimensional) or at the first or second hidden layer (50-dimensional). An illustration of the dataset and the architecture is given in the appendix.

We generate synthetic data with  $D_0$  (background) as mixture of Gaussian and  $D_1$  (foreground 1),  $D_2$  (foreground 2),  $D_3$  (foreground 3) as Gaussian distribution with their mean and standard deviation (0.01) as illustrated in the figure 3(a). An illustration of mosaic data (segments  $m = 9$ ) created using base synthetic data is shown in the figure 3 (b).

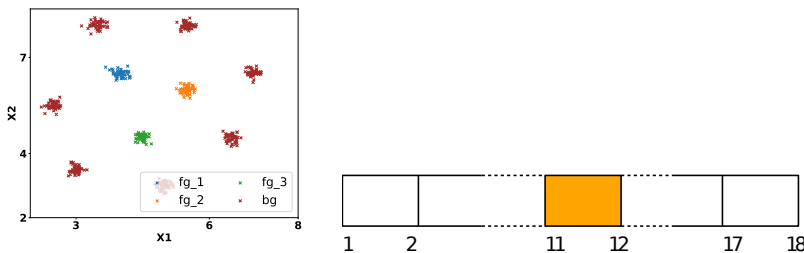Figure 3: (a) Synthetic Dataset, (b) Mosaic Instance from Synthetic Dataset having one patch from  $fg_2$

D.0.1. EXPERIMENTS ON SYNTHETIC SDC DATASET

Figure 4 shows the MLP architecture we employed, with two and one hidden layers in focus and classification modules respectively, each of 50 hidden dimension. We used Adam optimizer with learning rate of 0.0005 and tuned learning rate over search space of 0.001, 0.003, 0.0005. For the entropy experiments, we considered the  $\lambda$  values in the set  $\{0.001, 0.003, 0.005\}$  and trained our models for 5 different random seeds among  $\{0, 1, 2, 3, 4\}$ . Figure 5 shows the fraction of instances for which the attention vector  $\alpha$  scores the true foreground index above a threshold. In table 1, Zeroth Layer averaging with entropy regularisation is average over 4 runs.

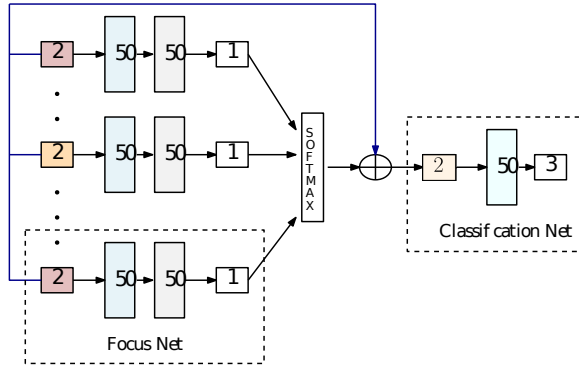

Figure 4: Architecture for Synthetic Dataset with averaging at zeroth Layer

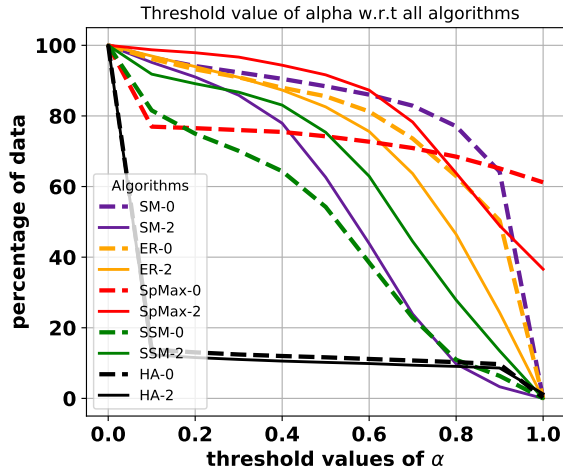

Figure 5: Fraction of test data for which the focus score  $\alpha_{j^*}$  for the true foreground index  $j^*$  is above a threshold, plotted as function of the threshold for the algorithms mentioned in Table 1

## Appendix E. Further Details on Experiments with Synthetic CIFAR10 Dataset

For CIFAR data we use the CNN architecture with 6 CNN along with 3 linear layers in focus and classification modules. We used Adam optimizer with learning rate of 0.0005 and tuned learning rate over search space of 0.001, 0.003, 0.0005. For the entropy experiments, we considered the  $\lambda$  values in the set  $\{0.001, 0.003, 0.005\}$  and trained our models for 3 different random seeds among  $\{0, 1, 2\}$ . In table 2, Zeroth Layer averaging with entropy regularisation is average over 2 runs.

| Category ID | Label         | Words associated                                                                                                                       |
|-------------|---------------|----------------------------------------------------------------------------------------------------------------------------------------|
| 1           | man           | man, men, woman, women, child, children, kid, kids, girl, girls, boy, boys, male, female, person                                       |
| 2           | bicycles      | bicycles, bicycle, cycles, bike                                                                                                        |
| 3           | car           | car, cars, van, volkswagon, vehicles, bmw, automobile, suv                                                                             |
| 4           | motorcycle    | motorcycle, motorcycles, bike, bikes, motorcyclist, motorized, motor, scooters, motorbikes,                                            |
| 5           | airplane      | airplane, plane, bomber, airplanes, air, crafts, jets, glider, bi-plane aircraft, jet, cargo, airliner,                                |
| 6           | bus           | bus, school bus, double decker, busses, vehicles                                                                                       |
| 7           | train         | train, train engine, cargo train, rails, locomotive, steam engine, train car, diesel train engine, engine                              |
| 8           | truck         | truck, fire trucks, tow truck, trucks, pickup truck, trailer, vehicles                                                                 |
| 9           | boat          | boat, canoe, cargo boat, ship, trawler, sailboats, rafts                                                                               |
| 10          | traffic light | traffic light, stop light, red light, green light, traffic sign                                                                        |
| 11          | fire hydrant  | fire hydrant, firehydrant, hydrant                                                                                                     |
| 13          | stop sign     | stop sign, street sign, sign, signs                                                                                                    |
| 14          | parking meter | parking meter, meter                                                                                                                   |
| 15          | bench         | bench, seat, chairs, lounge                                                                                                            |
| 16          | bird          | bird, red robin, parrot, ostrich, swans, ducks, geese, owl, birds, swan, duck, seagull, duckling, flamingos, pigeons, toucan, seagulls |
| 17          | cat           | cat, cats, kitten, kittens, animal, animals                                                                                            |
| 18          | dog           | dog, dogs, bulldog, puppy, pup, animal, animals                                                                                        |
| 19          | horse         | horse, carriage, animal, animals, horses                                                                                               |
| 20          | sheep         | sheep, cattle, animal, animals, lamb, lambs                                                                                            |
| 21          | cow           | cow, cows, calf, calfs, calves, animal, animals, cattle, oxen, ox                                                                      |
| 22          | elephant      | elephant, elephants, animal, animals                                                                                                   |
| 23          | bear          | bear, bears, cub, cubs, animal, animals                                                                                                |
| 24          | zebra         | zebra, zebras, animal, animals                                                                                                         |

Table 2: Word association table for the case study in Section 2

| Category ID | Label          | Words associated                                                                                              |
|-------------|----------------|---------------------------------------------------------------------------------------------------------------|
| 25          | giraffe        | giraffe, giraffes, animal, animals                                                                            |
| 27          | backpack       | backpack, bag, bags, backpacks, luggage, back pack                                                            |
| 28          | umbrella       | umbrella, umbrellas                                                                                           |
| 31          | handbag        | handbag, handbags, bag, bags, luggage                                                                         |
| 32          | tie            | tie, ties                                                                                                     |
| 33          | suitcase       | suitcase, suitcases, luggage, suit case                                                                       |
| 34          | frisbee        | frisbee, frisbees, frizbee, frizbees, frisk bee                                                               |
| 35          | skis           | skis, skiing, skier, skiers, ski, spikes, ski                                                                 |
| 36          | snowboard      | snowboard, snowboarding, snowboarder, snow board, ski boarder                                                 |
| 37          | sports ball    | sports ball, ball, soccer, baseball, tennis ball, football, volleyball, basketball, soccer ball, soccer balls |
| 38          | kite           | kite, object, kites                                                                                           |
| 39          | baseball bat   | baseball bat, bat, bats                                                                                       |
| 40          | baseball glove | baseball glove, baseball gloves, gloves, glove, catcher, catch, mitt                                          |
| 41          | skateboard     | skateboard, skateboarders, skateboarder, skate board, skateboarding, skate boarding                           |
| 42          | surfboard      | surfboard, surf board, surfer, boogie, board, wakeboard, surfing                                              |
| 43          | tennis racket  | tennis racket, tennis racket, tennis rackets, rackets                                                         |
| 44          | bottle         | bottle, bottles, soda, soda, can, drinks, water bottle, water jars                                            |
| 46          | wine glass     | wine glass, wine glasses, glass, glasses, drink, drinking, drinks                                             |
| 47          | cup            | cup, cups, mug, mugs, drink, coffee, tea                                                                      |
| 48          | fork           | fork, forks, silverware                                                                                       |
| 49          | knife          | knife, knives, silverware                                                                                     |
| 50          | spoon          | spoon, spoons, silverware                                                                                     |
| 51          | bowl           | bowl, bowls, dishes, dish, cup, cups                                                                          |
| 52          | banana         | banana, bananas, fruit, fruits                                                                                |
| 53          | apple          | apple, apples, fruit, fruits                                                                                  |
| 54          | sandwich       | sandwich, hamburger, hamburgers, burgers, sandwiches, burger, bun                                             |
| 55          | orange         | orange, oranges, fruit, fruits                                                                                |
| 56          | broccoli       | broccoli, vegetables, vegetable, food, meal                                                                   |
| 57          | carrot         | carrot, carrots, vegetable, vegetables, food, meal                                                            |
| 58          | hot dog        | hot dog, hot dogs, hotdog, hotdogs, sandwich, sandwiches, bun                                                 |
| 59          | pizza          | pizza, bread, baked, pizzas, food                                                                             |
| 60          | donut          | donut, donuts, cookies, baked, pastries, doughnuts, doughnut, food, dessert, pie                              |
| 61          | cake           | cake, cakes, pastries, pastry, dessert, pie                                                                   |

Table 3: Word association table for the case study in Section 2

| Category ID | Label        | Words associated                                                                                                                                                      |
|-------------|--------------|-----------------------------------------------------------------------------------------------------------------------------------------------------------------------|
| 62          | chair        | chair, chairs, furniture, furnitures                                                                                                                                  |
| 63          | couch        | couch, couches, furniture, furnitures, recliner, recliners                                                                                                            |
| 64          | potted plant | potted plant, potted plants, pot, pots, plants, plant, vases, flowers, flower, leaves, leaf                                                                           |
| 65          | bed          | bed, beds, furniture, furnitures                                                                                                                                      |
| 67          | dining table | dinning table, table, tables, furniture, furnitures, dinner table                                                                                                     |
| 70          | toilet       | toilet, bathroom, restroom, toilette seat                                                                                                                             |
| 72          | tv           | tv, screen, t.v., television, monitor, monitors, televisions                                                                                                          |
| 73          | laptop       | laptop, computer, monitor, computers, monitors, laptops                                                                                                               |
| 74          | mouse        | mouse                                                                                                                                                                 |
| 75          | remote       | remote, remotes, controller                                                                                                                                           |
| 76          | keyboard     | keyboard, key board, keyboards                                                                                                                                        |
| 77          | cell phone   | cell phone, cell, phone, phones, mobiles, mobile                                                                                                                      |
| 78          | microwave    | microwave, appliances, appliance                                                                                                                                      |
| 79          | oven         | oven, appliances, appliance                                                                                                                                           |
| 80          | toaster      | toaster, appliances, appliance                                                                                                                                        |
| 81          | sink         | sink                                                                                                                                                                  |
| 82          | refrigerator | refrigerator, fridge, refrigerators, fridges                                                                                                                          |
| 84          | book         | book, books                                                                                                                                                           |
| 85          | clock        | clock, clocks                                                                                                                                                         |
| 86          | vase         | vase, vases, bouquet, pot                                                                                                                                             |
| 87          | scissors     | scissors                                                                                                                                                              |
| 88          | teddy bear   | teddy bear, toy, soft toy, stuffed animal, teddy, panda bear, teddy bears, stuffed animals,stuff bears, stuffed panda, bear, doll, dolls, stuffed bear, stuffed bears |
| 89          | hair drier   | hair drier, hair dryer, hairdryer, hair products, hair product, blow dryer                                                                                            |
| 90          | toothbrush   | toothbrush, brush, object, tooth, brush                                                                                                                               |

Table 4: Word association table for the case study in Section 2
